# Supplementary material
Source: HighWire-hosted journal article supplement (https://gut.bmj.com/content/68/5/916)
Supplement: inline-supplementary-material-1 [file inline-supplementary-material-1.pdf]

Supplementary  
tables and figures

**Table S1: Clinical and demographic information of patients involved in CyTOF analysis (Total n=23)**

| Characteristics                           |  | HBV (n=12)          | NV (n=11)          |
|-------------------------------------------|--|---------------------|--------------------|
| Age [Median (range)]                      |  | 64 (52, 79)         | 72 (48, 87)        |
| Tumor size (cm) [Median (range)]          |  | 6.3 (1.7, 14.0)     | 6.3 (1.5, 20.0)    |
| Pre surgery AFP (ng/mL) [Median (range)]  |  | 12.0 (5.8, 11737.0) | 7.9 (1.8, 17349.0) |
| Ethnicity                                 |  |                     |                    |
| Chinese                                   |  | 11 (91.7%)          | 9 (81.8%)          |
| Others                                    |  | 1 (8.3%%)           | 2 (18.2%)          |
| Gender                                    |  |                     |                    |
| Male                                      |  | 10 (83.3%)          | 10 (90.9%)         |
| Female                                    |  | 2 (16.7%)           | 1 (9.1%)           |
| Edmondson Grading                         |  |                     |                    |
| I, II or I-II                             |  | 3 (25.0%)           | 7 (63.6%)          |
| III or II-III                             |  | 8 (66.7%)           | 4 (36.4%)          |
| IV                                        |  | 1 (8.3%)            | 0 (0.0%)           |
| TMN Staging                               |  |                     |                    |
| 1                                         |  | 5 (41.7%)           | 5 (45.4%)          |
| 2                                         |  | 2 (16.6%)           | 0 (0.0%)           |
| 3                                         |  | 5 (41.7%)           | 5 (45.4%)          |
| 4                                         |  | 0 (0.0%)            | 1 (9.2%)           |
| Barcelona classification                  |  |                     |                    |
| 0/A                                       |  | 10 (83.3%)          | 7 (63.6%)          |
| B                                         |  | 2 (16.7%)           | 4 (36.4%)          |
| Fibrosis status (Stage)                   |  |                     |                    |
| 0                                         |  | 5 (41.7%)           | 11 (100%)          |
| 2-4                                       |  | 7 (58.3%)           | 0 (0%)             |
| Liver enzyme level (U/L) [Median (range)] |  |                     |                    |
| AST                                       |  | 35.5 (12.0, 141.0)  | 35.0 (21.0, 203.0) |
| ALT                                       |  | 34.5 (21.0, 87.0)   | 34.0 (16.0, 69.0)  |
| HBV DNA (log IU/ml) * [Median (range)]    |  | 2.58 (1.30, 6.42)   | NA                 |

**Footnote:**

AFP= Alpha fetoprotein level

HBV= Hepatitis B viral; NV= Non viral

\*= anti-viral treatment was given before surgery

NA= non-applicable

n=7 HBV vs n=7 NV (n=14) were compared in each figure however only 5 of them have enough NILs hence additional 9 cases were included for comparison of NILs

**Table S2: Clinical and demographic information of TMA cohort involved in multiplex immunofluorescence FFPE tissues staining and survival analysis (n=102)**

| Characteristics                                   | HBV (n=48)          | Non-viral (n=54)   |
|---------------------------------------------------|---------------------|--------------------|
| Age (Median (range))                              | 64 (44, 83)         | 64 (15, 88)        |
| Tumor size (cm) (Median (range))                  | 3.8 (0.9, 30.2)     | 5.75 (1.1, 21.0)   |
| Pre surgery AFP ( <i>ng/mL</i> ) (Median (range)) | 13.4 (1.8, 34272.0) | 11 (1.0, 70700.0)  |
| Ethnicity                                         |                     |                    |
| Chinese                                           | 43 (89.6%)          | 40 (74.1%)         |
| Others                                            | 5 (10.4%)           | 14 (25.9%)         |
| Gender                                            |                     |                    |
| Male                                              | 37 (77.1%)          | 44 (81.5%)         |
| Female                                            | 11 (22.9%)          | 10 (18.5%)         |
| Median Survival (yrs)                             | 3.57 (0.03, 12.48)  | 3.85 (0.02, 13.34) |
| Edmondson Grading                                 |                     |                    |
| I-II                                              | 46 (95.8%)          | 40 (74.1%)         |
| III-IV                                            | 2 (4.2%)            | 14 (25.9%)         |
| TMN Staging                                       |                     |                    |
| 1                                                 | 32 (66.7%)          | 26 (48.1%)         |
| 2                                                 | 12 (25.0%)          | 13 (24.1%)         |
| 3                                                 | 2 (4.2%)            | 14 (25.9%)         |
| 4                                                 | 2 (4.2%)            | 1 (1.9%)           |

**Table S3: Clinical and demographic information of international cohort involved in survival analysis (Total n=116 from Singapore n=37, Hong Kong n=42 and Zurich n=37)**

| Characteristics                                   | HBV (n=75)            | Non-viral (n=41)   |
|---------------------------------------------------|-----------------------|--------------------|
| Age (Median (range))                              | 56 (23, 78)           | 69 (20, 83)        |
| Tumor size (cm) (Median (range))                  | 4.3 (0.7, 27.0)       | 9.0 (1.2, 23.0)    |
| Pre surgery AFP ( <i>ng/mL</i> ) (Median (range)) | 102.0 (2.0, 468600.0) | 5.0 (1.0, 12630.5) |
| Ethnicity                                         |                       |                    |
| Chinese                                           | 65 (86.7%)            | 13 (31.7%)         |
| Others                                            | 10 (13.3%)            | 28 (68.3%)         |
| Gender                                            |                       |                    |
| Male                                              | 63 (84.0%)            | 30 (73.2%)         |
| Female                                            | 12 (16.0%)            | 11 (26.8%)         |
| Median Survival (yrs) (range)                     | 5.0 (0.05, 16.31)     | 3.9 (0.16, 15.91)  |
| Edmondson Grading                                 |                       |                    |
| I-II                                              | 60 (80.0%)            | 29 (70.7%)         |
| III-IV                                            | 15 (20.0%)            | 12 (29.3%)         |
| TMN Staging                                       |                       |                    |
| 1                                                 | 21 (28.0%)            | 15 (36.6%)         |
| 2                                                 | 21 (28.0%)            | 13 (31.7%)         |
| 3                                                 | 27 (36.0%)            | 11 (26.8%)         |
| 4                                                 | 6 (8.0%)              | 2 (4.9%)           |

**Table S4: Antibodies used for CyTOF staining**

| Isotopes       | Antibodies       | Clone     | Vendor           |
|----------------|------------------|-----------|------------------|
| <b>112/114</b> | CD14             | TüK4      | Lifetechnologies |
| <b>139</b>     | CD3              | UCHT1     | Biolegend        |
| <b>141</b>     | CD45 (Barcode 1) | HI30      | Biolegend        |
| <b>142</b>     | CD45RO           | UCHL1     | Biolegend        |
| <b>143</b>     | HLA-DR           | L243      | Biolegend        |
| <b>144</b>     | CD8              | SK1       | Biolegend        |
| <b>145</b>     | T-bet            | 4B10      | Biolegend        |
| <b>146</b>     | CD28             | CD28.2    | Biolegend        |
| <b>147</b>     | PD-1             | EH12.2H7  | Biolegend        |
| <b>148</b>     | CD4              | SK3       | Biolegend        |
| <b>149</b>     | CD154            | 24-31     | Biolegend        |
| <b>150</b>     | CD103            | B-Ly7     | Ebioscience      |
| <b>151</b>     | CD134            | Ber-ACT35 | Biolegend        |
| <b>152</b>     | TNF-a            | MAb11     | Biolegend        |
| <b>153</b>     | CD45 (Barcode 2) | HI30      | Biolegend        |
| <b>154</b>     | CD27             | O323      | Biolegend        |
| <b>155</b>     | CD152            | BN13      | BD bioscience    |
| <b>156</b>     | PD-L1            | 29E.2A3   | Biolegend        |
| <b>157</b>     | CD244            | CL7       | Biolegend        |
| <b>158</b>     | IL-10            | JES3-9D7  | Biolegend        |
| <b>159</b>     | LAG-3            | 17B4      | Abcam            |
| <b>160</b>     | TIM-3            | F38-2E2   | Biolegend        |
| <b>161</b>     | CCR7             | G043H7    | Biolegend        |
| <b>162</b>     | CD56             | NCAM16.2  | BD bioscience    |
| <b>163</b>     | CXCR3            | G025H7    | Biolegend        |
| <b>164</b>     | GITR             | 621       | Biolegend        |
| <b>165</b>     | FoxP3            | PCH101    | Ebioscience      |
| <b>166</b>     | Ki67             | 20Raj1    | Ebioscience      |
| <b>167</b>     | CD80             | 2D10      | Biolegend        |
| <b>168</b>     | IFN-y            | B27       | Biolegend        |
| <b>169</b>     | IL-17A           | BL168     | Biolegend        |
| <b>170</b>     | CD45 (Barcode 3) | HI30      | Biolegend        |
| <b>171</b>     | CD45RA           | JS-83     | Ebioscience      |
| <b>172</b>     | CD86             | IT2.2     | Biolegend        |
| <b>173</b>     | GranzymeB        | CLB-GB11  | Abcam            |
| <b>174</b>     | CD137            | 4B4-1     | Biolegend        |
| <b>175</b>     | CCR5             | T21/8     | Biolegend        |
| <b>176</b>     | CD69             | FN50      | Biolegend        |
| <b>191/193</b> | Ir Intercalator  |           | Fluidigm         |

**Table S5: Antibodies used for multiplexed immunofluorescence tissue staining (Opal)**

| Antibody                                   | Host   | Clone       | Company and location |
|--------------------------------------------|--------|-------------|----------------------|
| <b>Anti-Human CD4</b>                      | Mouse  | EPR6855     | Abcam, Cambridge, UK |
| <b>Anti-Human CD8</b>                      | Mouse  | C8/144B     | DAKO                 |
| <b>Anti-Human FOXP3</b>                    | Mouse  | 236A/E7     | Abcam, Cambridge, UK |
| <b>Anti-Human Integrin alpha E (CD103)</b> | Rabbit | EPR4166 (2) | Abcam, Cambridge, UK |



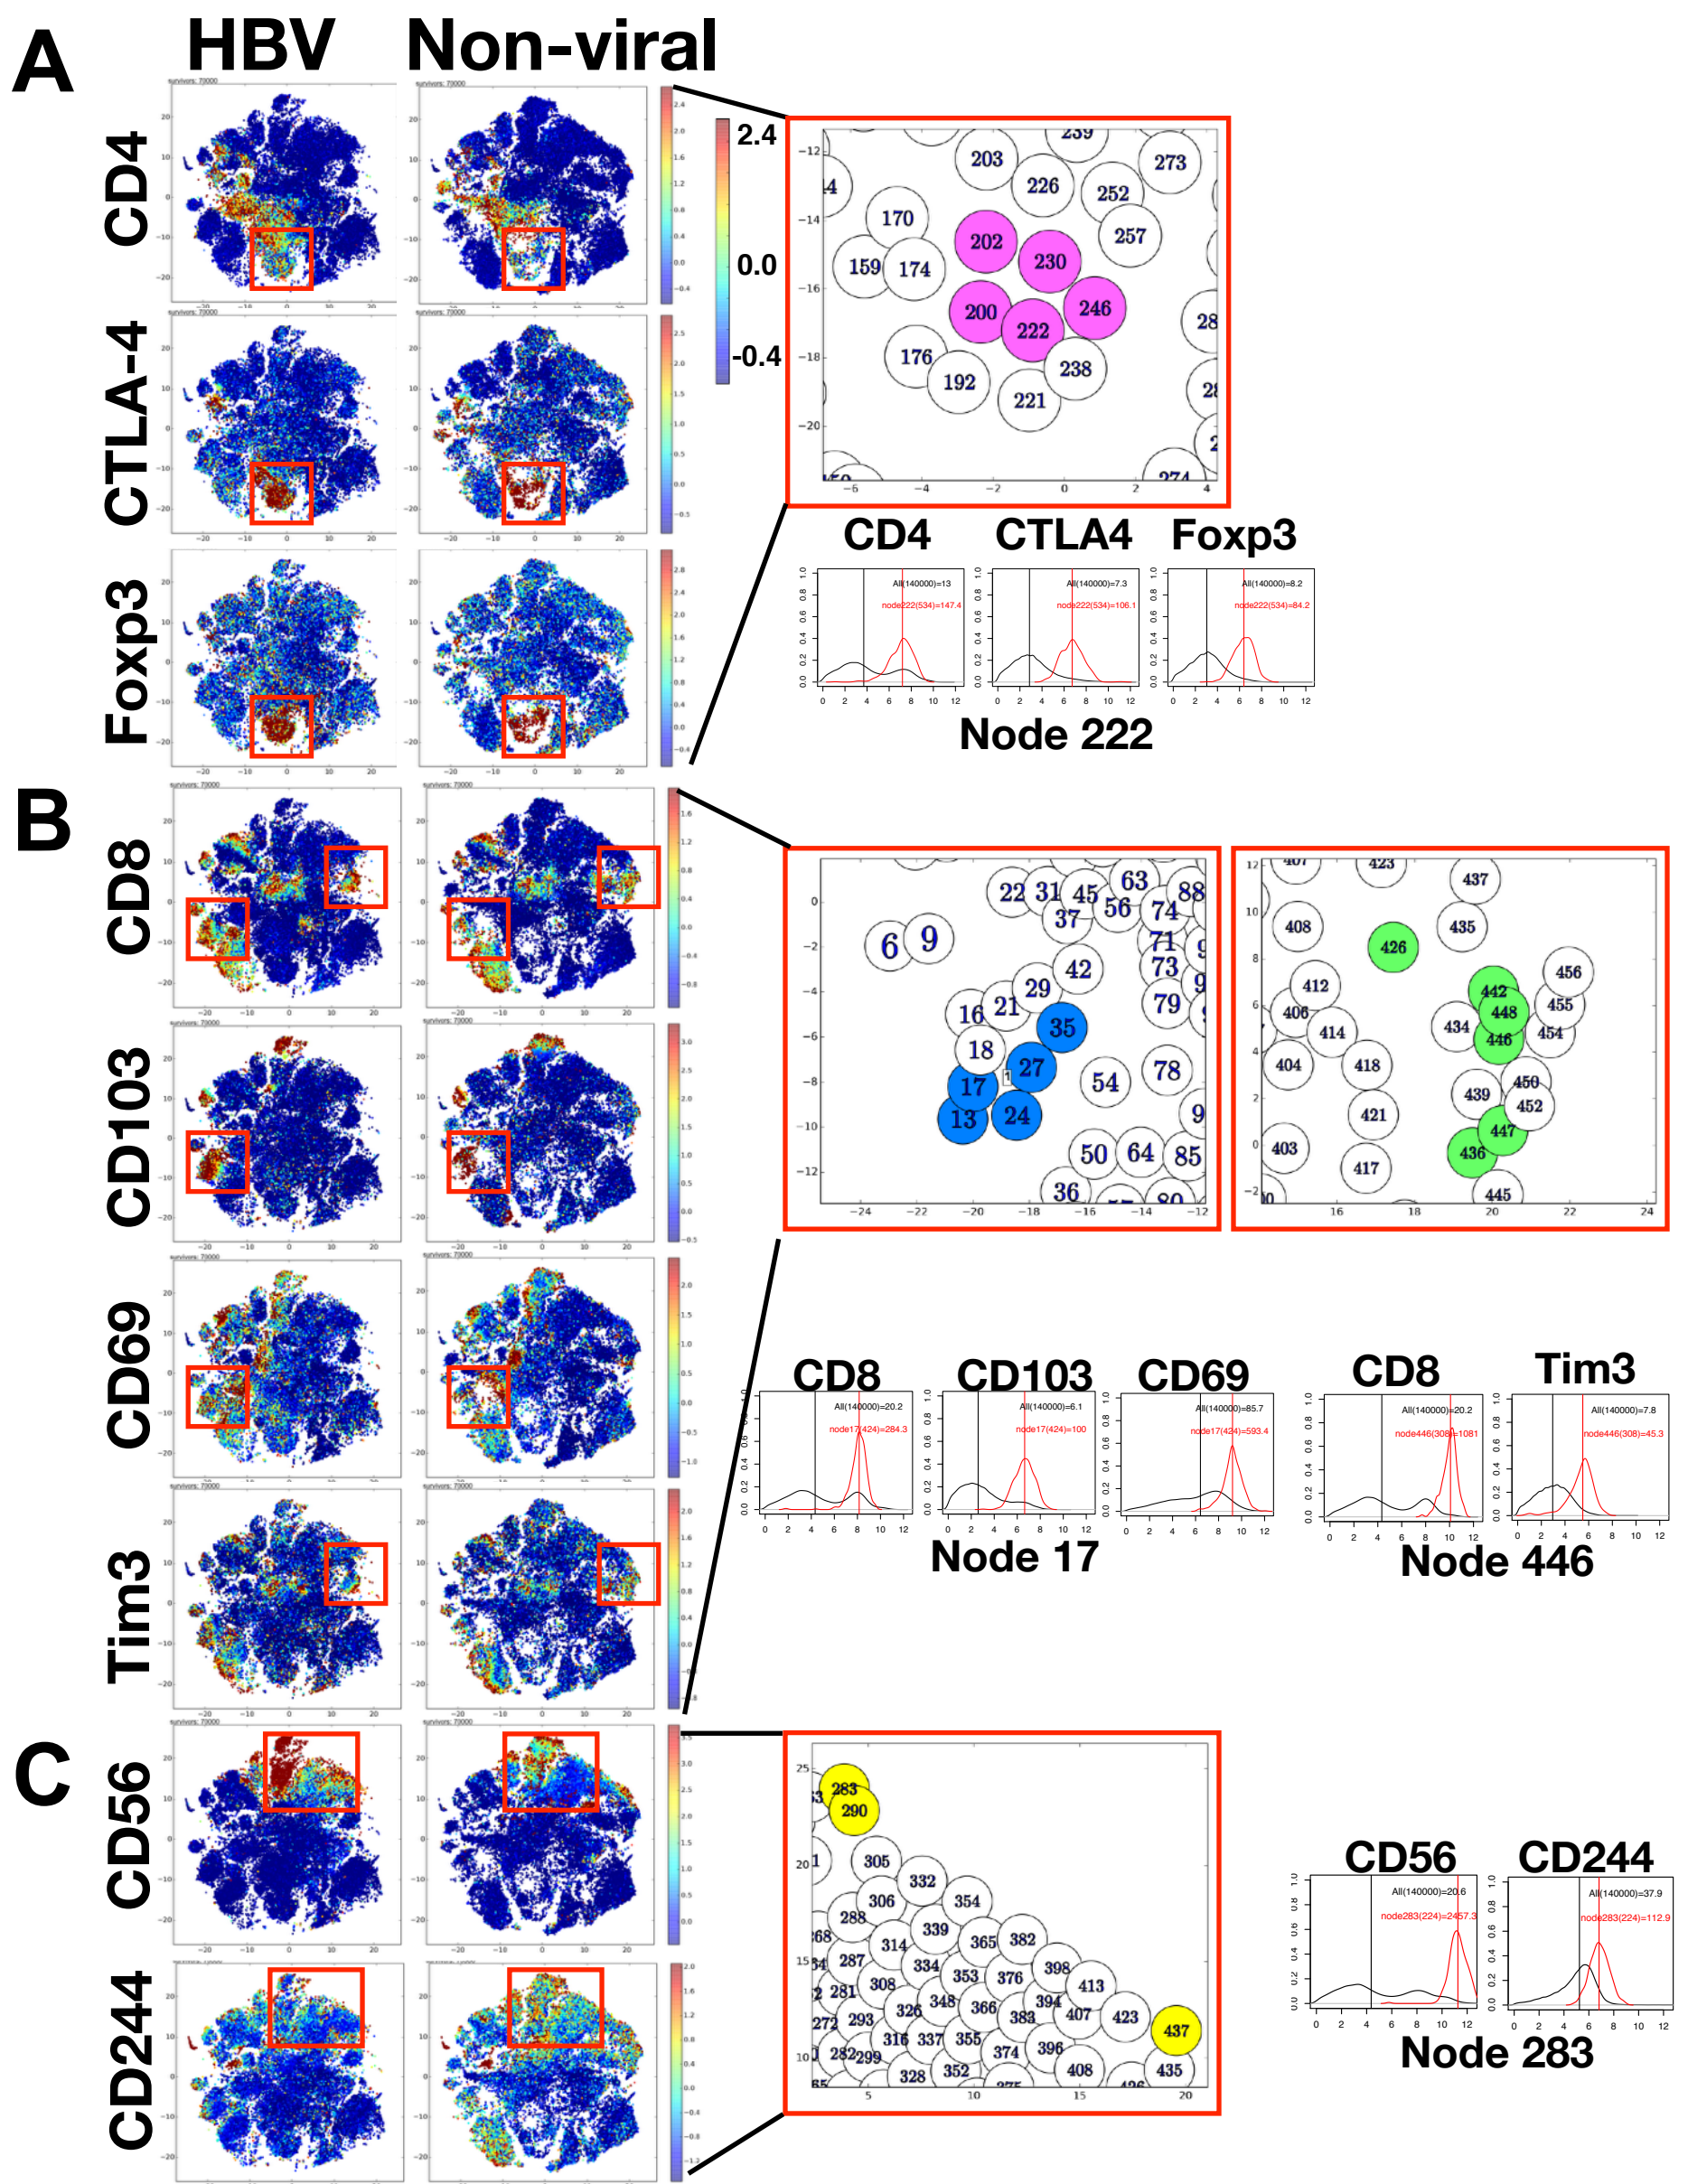

**Figure S1: 2D cellular t-SNE plots of CyTOF data from HBV- or non-viral-related TILs.**

A. t-SNE and density plots showing T<sub>REG</sub> markers: CD4, CTLA4 and Foxp3 represented by Node no. 222.

B. t-SNE and density plots showing T<sub>RM</sub> markers: CD8, CD103 and CD69 (represented by Node 17) and CD8<sup>+</sup>Tim3<sup>+</sup> T cells (represented by Node 446).

C. t-SNE and density plots showing CD244<sup>+</sup>CD56<sup>+</sup> NK cells represented by Node 283.

The density plots: red curve showing the expression profile of the indicated Node and black curve showed the marker expression profile of all nodes. Red and black lines showed the respective average marker expression levels. HBV: hepatitis B virus; TILs: tumor-infiltrating lymphocytes.

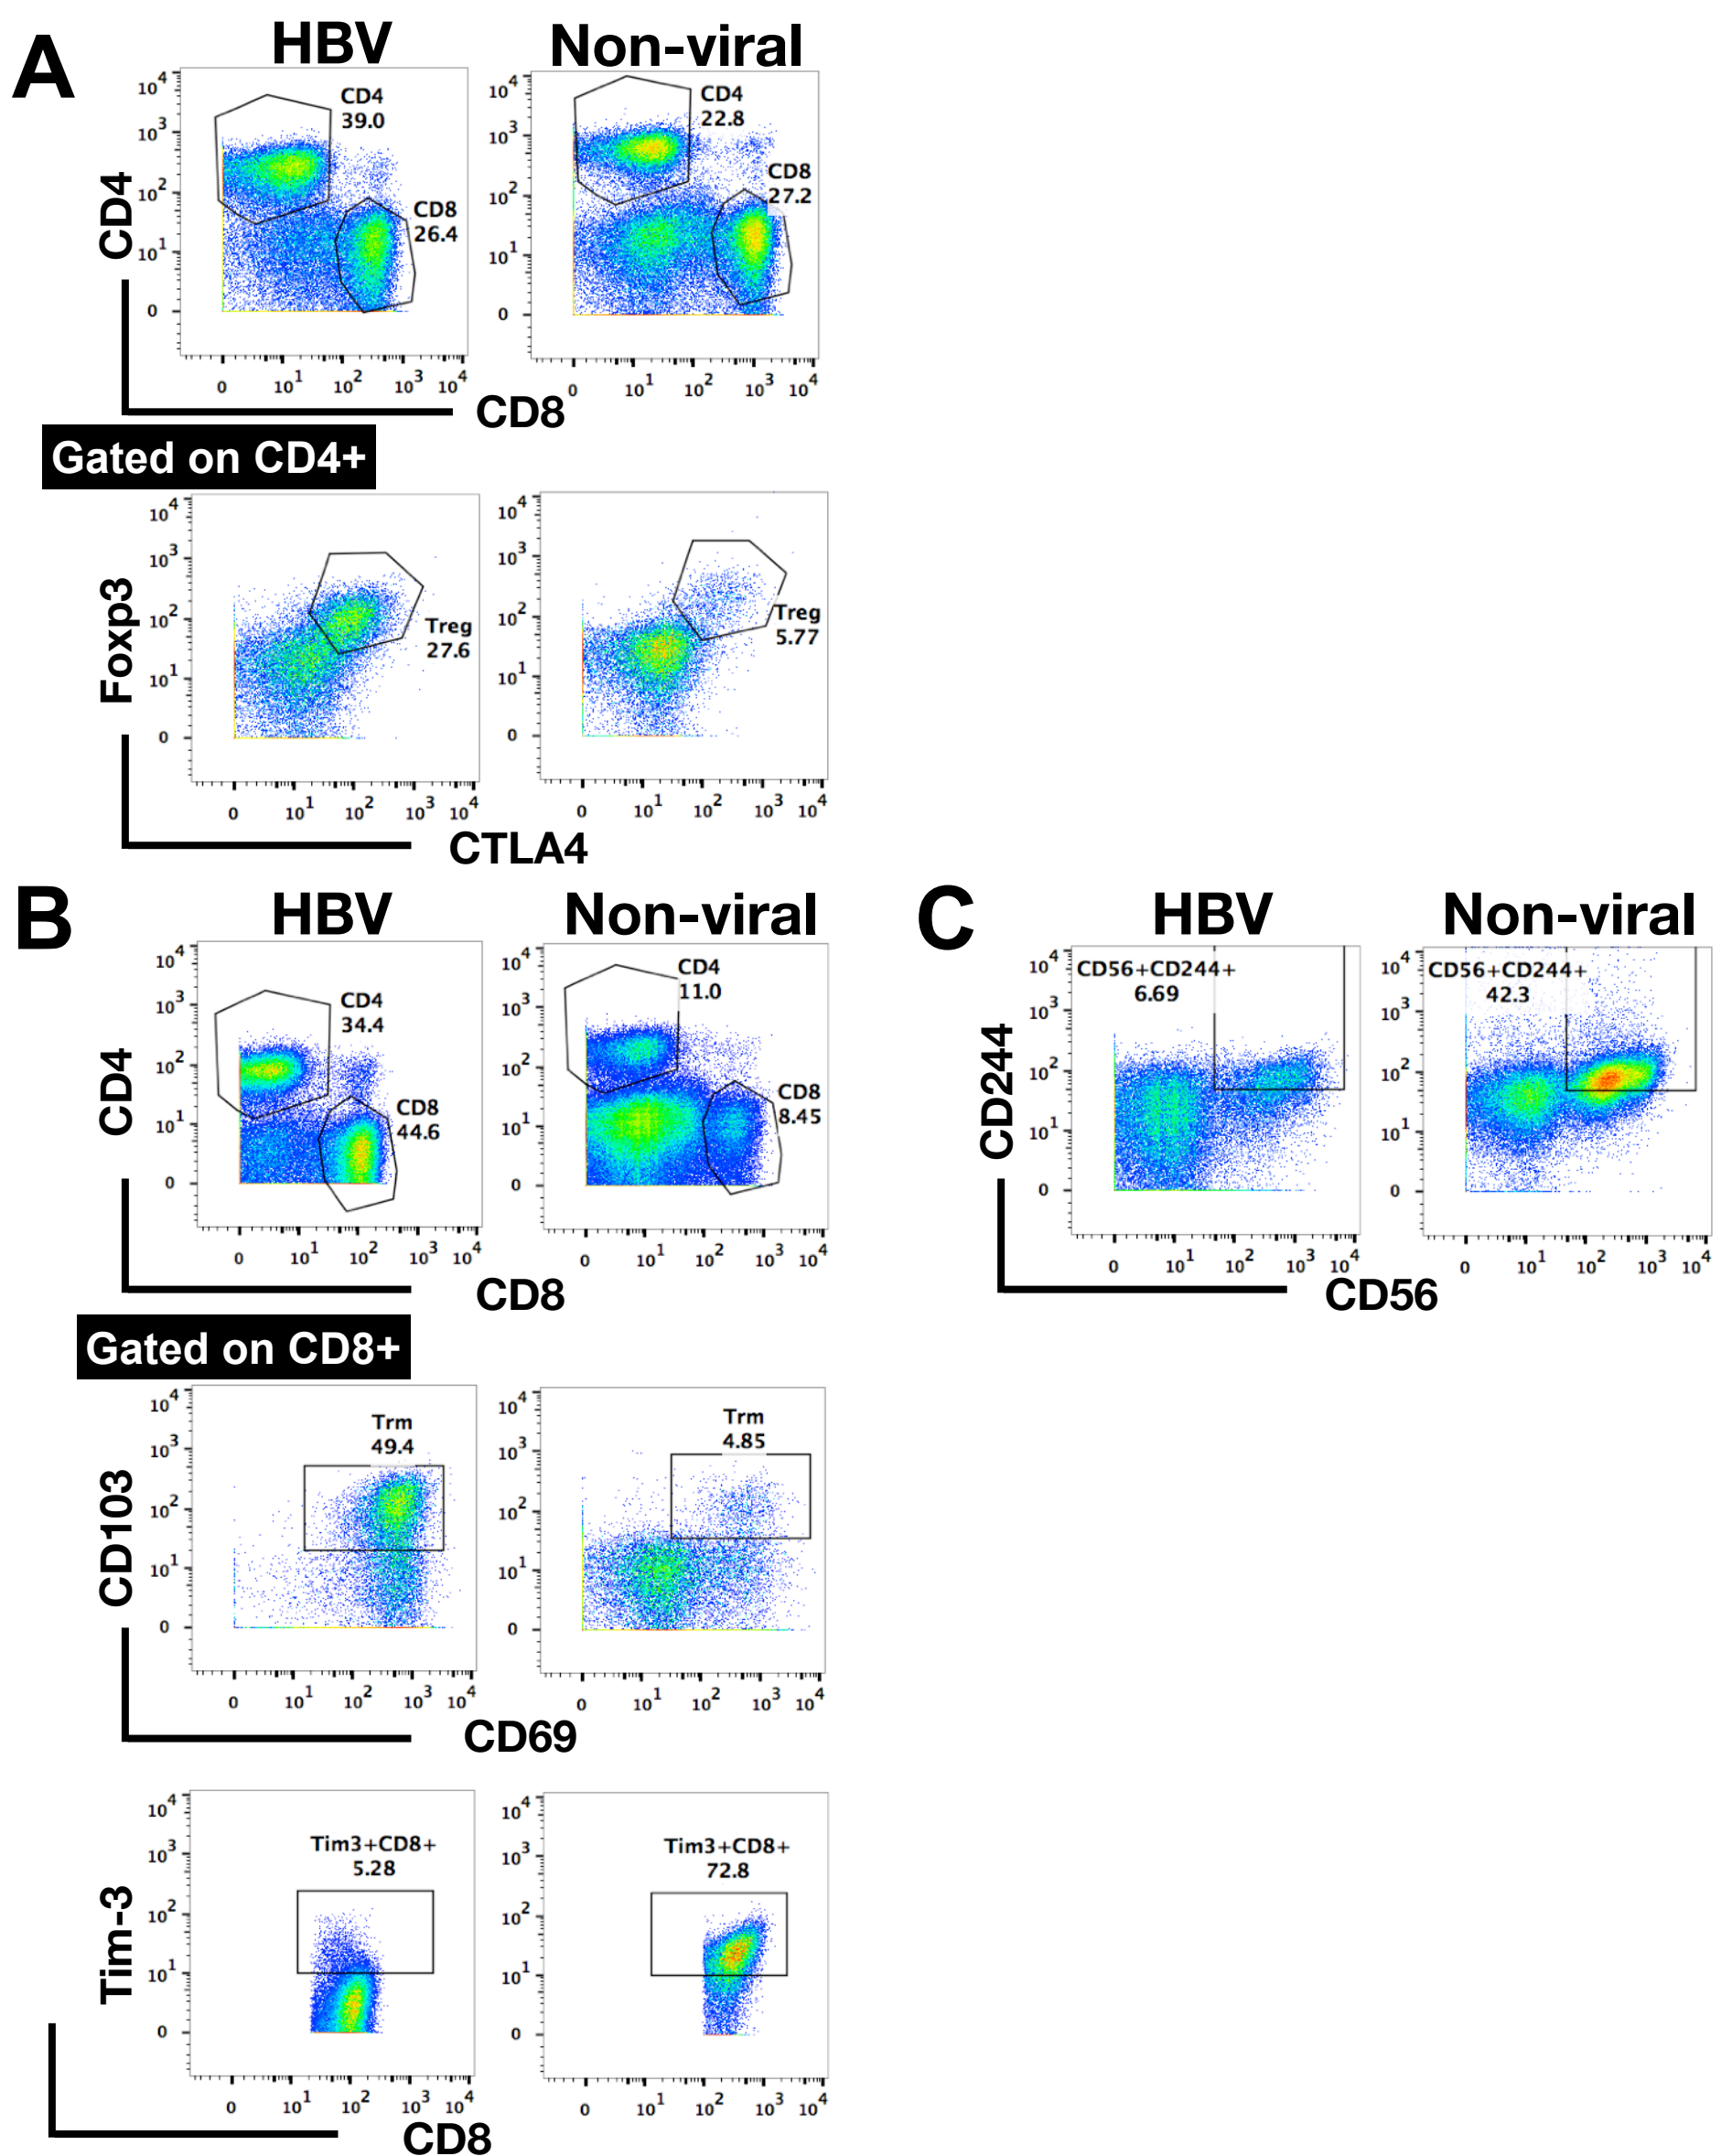

**Figure S2: Representative manual gating plots for the major immune subsets enriched in either HBV- or non-viral-related HCC TILs.**

A. Representative plots for T<sub>REG</sub> manual gating on TILs from HEP2050 (HBV) and HEP178 (non-viral) HCC patients.

B. Representative plots for T<sub>RM</sub> and Tim3<sup>+</sup>CD8<sup>+</sup> T cells manual gating on TILs from HEP125 (HBV) and HEP152 (non-viral) HCC patients.

C. Representative plots for CD244<sup>+</sup>CD56<sup>+</sup> NK cells manual gating on TILs from HEP0302 (HBV) and HEP0301 (non-viral) HCC patients.

HBV: hepatitis B virus; HCC: hepatocellular carcinoma; TILs: tumor-infiltrating lymphocytes.



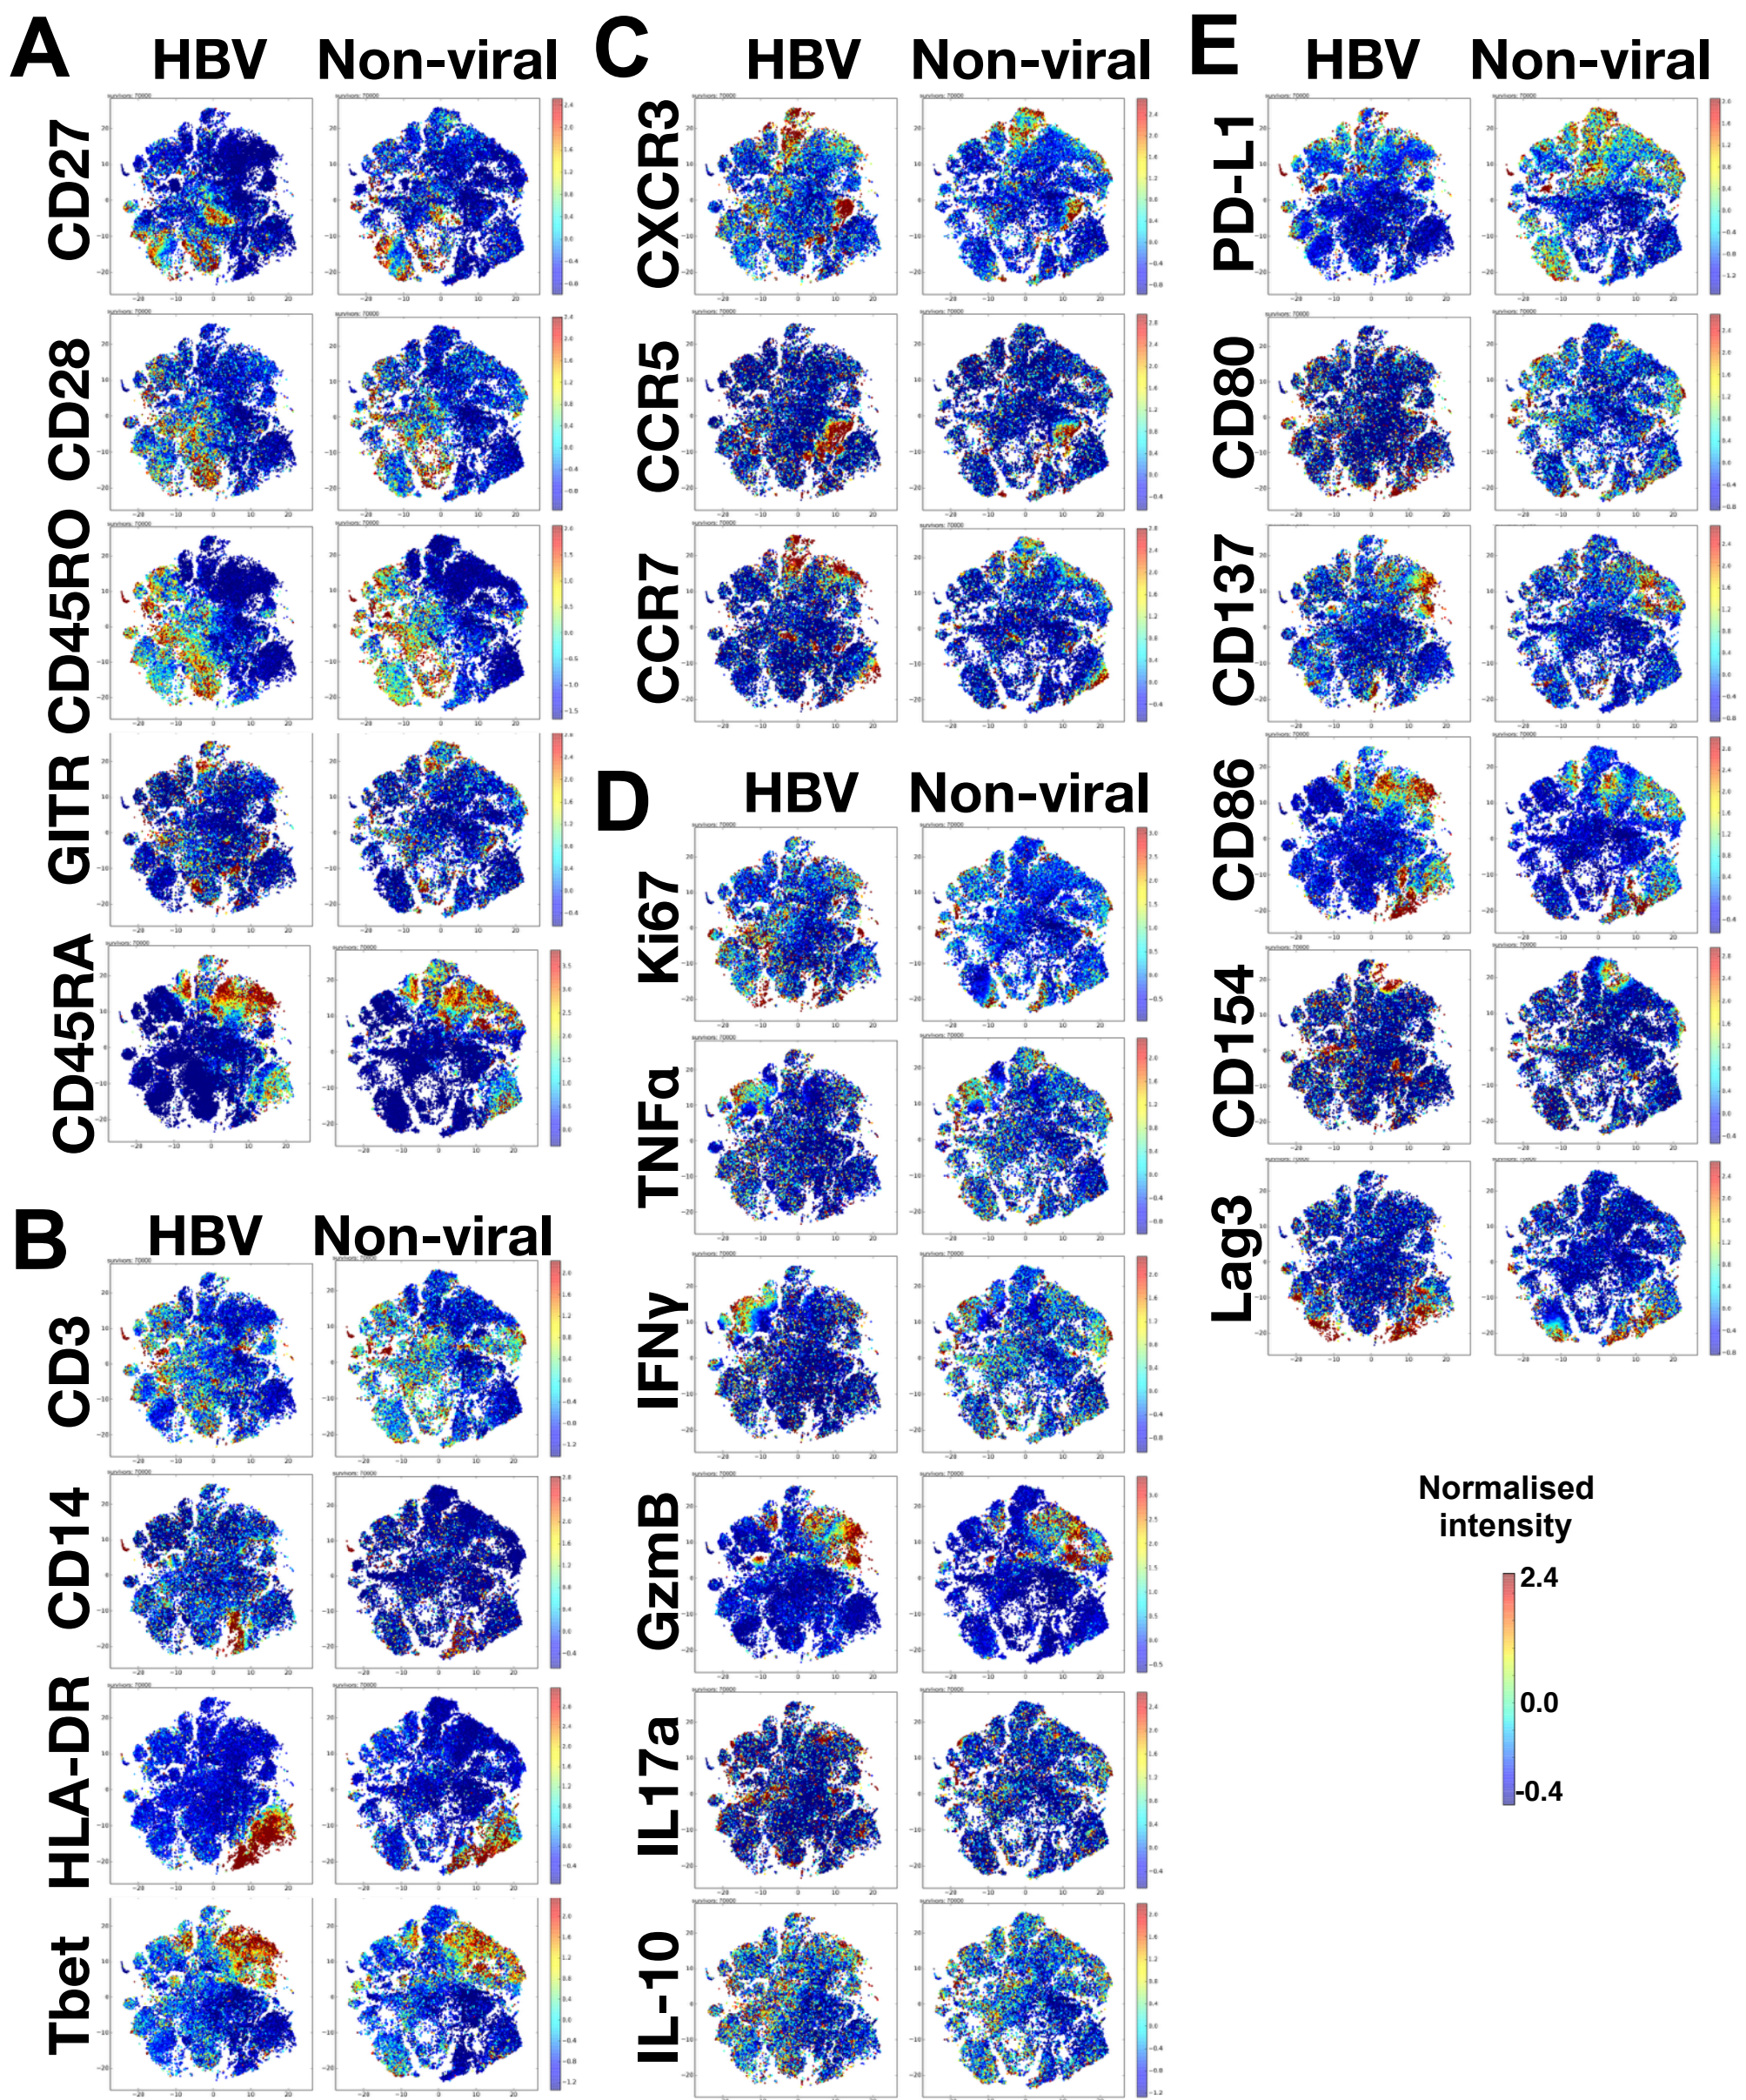

**Figure S3: 2D cellular t-SNE plots of CyTOF data from HBV- or non-viral-related HCC TILs.**

A. CD4-related markers.

B. Lineages-related markers

C. Chemokine receptors

D. Activation and cytokines markers

E. Other immune markers without distinct differences

HBV: hepatitis B virus; HCC: hepatocellular carcinoma; TILs: tumor-infiltrating lymphocytes.



**A**

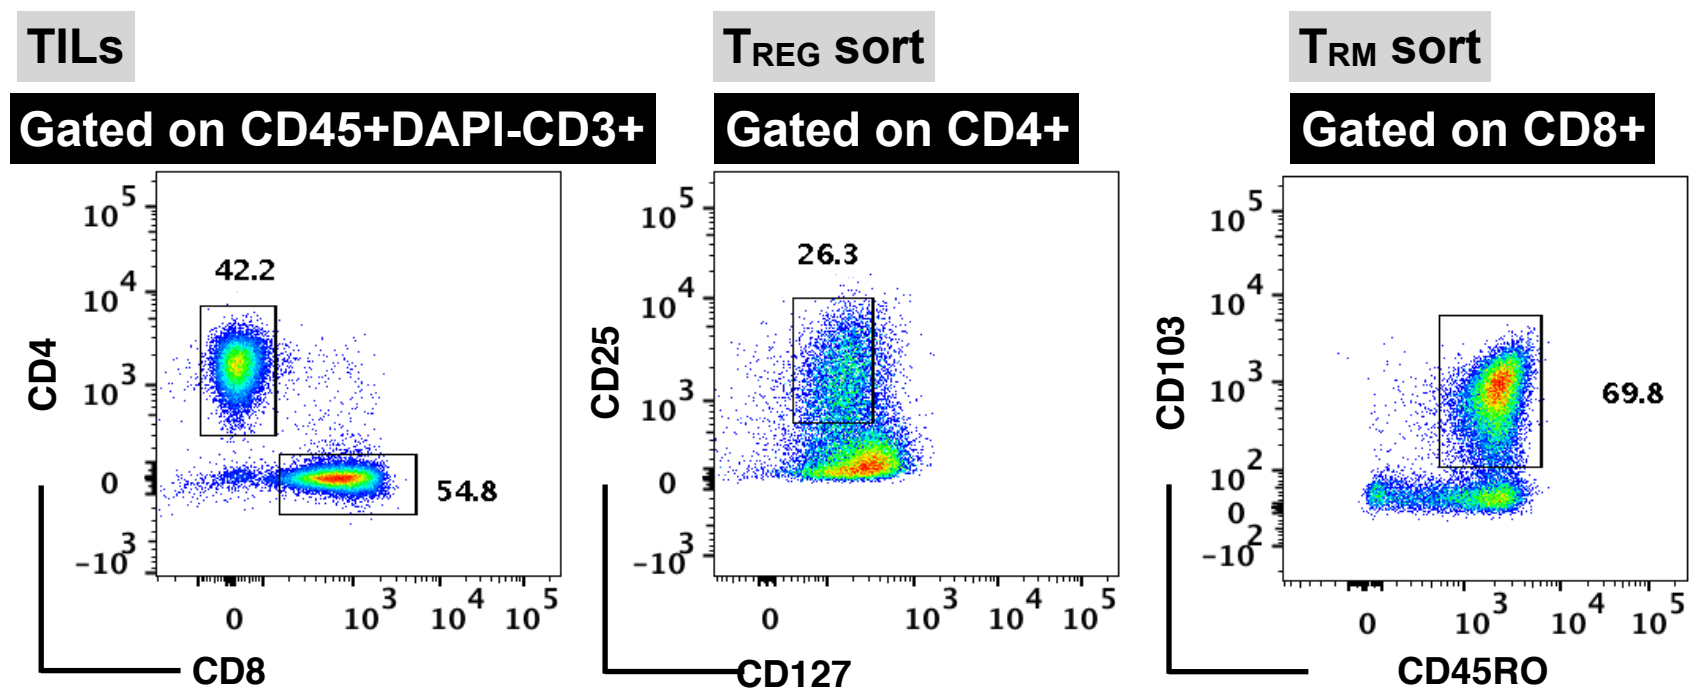

**Figure S4: Plots showing the sorting strategies of TILs subsets from HBV- or non-viral-related HCCs**

A. Representative pseudocolor plots illustrating sorting strategy for CD4CD25+CD127- (T<sub>REG</sub>) and CD8+CD45RO+CD103+ (T<sub>RM</sub>) populations from TILs.

HBV: hepatitis B virus; HCC: hepatocellular carcinoma; TILs: tumor-infiltrating lymphocytes.

**Supplementary Table S6: Selective list of significantly enriched genes in TREG isolated from HBV-related HCC**

**CELL CYCLE**

| Ensembl ID      | Gene Symbol | Annotation                                     | logFC  |
|-----------------|-------------|------------------------------------------------|--------|
| ENSG00000145386 | CCNA2       | cyclin A2                                      | 1.8194 |
| ENSG00000077380 | DYNC1I2     | dynein cytoplasmic 1 intermediate chain 2      | 1.0474 |
| ENSG00000039068 | CDH1        | cadherin 1                                     | 1.5848 |
| ENSG00000102384 | CENPI       | centromere protein I                           | 2.1195 |
| ENSG00000174442 | ZWILCH      | zwilch kinetochore protein                     | 1.0560 |
| ENSG00000101057 | MYBL2       | MYB proto-oncogene like 2                      | 1.4493 |
| ENSG00000167900 | TK1         | thymidine kinase 1                             | 1.2061 |
| ENSG00000137812 | KNL1        | kinetochore scaffold 1                         | 1.0641 |
| ENSG00000073111 | MCM2        | minichromosome maintenance complex component 2 | 1.0071 |

**IL-10 SIGNALLING**

| Ensembl ID      | Gene Symbol | Annotation                         | logFC  |
|-----------------|-------------|------------------------------------|--------|
| ENSG00000115594 | IL1R1       | interleukin 1 receptor type 1      | 1.1430 |
| ENSG00000115590 | IL1R2       | interleukin 1 receptor type 2      | 1.3602 |
| ENSG00000028137 | TNFRSF1B    | TNF receptor superfamily member 1B | 1.0937 |

**COMPLEMENT ACTIVATION**

| Ensembl ID      | Gene Symbol | Annotation                         | logFC  |
|-----------------|-------------|------------------------------------|--------|
| ENSG00000211937 | IGHV2-5     | immunoglobulin heavy variable 2-5  | 9.2278 |
| ENSG00000159403 | C1R         | complement C1r                     | 1.9038 |
| ENSG00000211956 | IGHV4-34    | immunoglobulin heavy variable 4-34 | 3.2238 |
| ENSG00000211679 | IGLC3       | immunoglobulin lambda constant 3   | 8.0135 |

**Supplementary Table S7: Selective list of significantly enriched genes in TRM isolated from HBV-related HCC**

**TCR SIGNALLING**

| Ensembl ID      | Gene Symbol | Annotation                                                 | logFC  |
|-----------------|-------------|------------------------------------------------------------|--------|
| ENSG00000198146 | ZAP70       | zeta chain of T cell receptor associated protein kinase 70 | 2.1272 |
| ENSG00000198821 | CD247       | CD247 molecule                                             | 2.3690 |
| ENSG00000179344 | HLA-DRB1    | major histocompatibility complex, class II, DR beta 1      | 2.0547 |
| ENSG00000196126 | HLA-DQB1    | major histocompatibility complex, class II, DQ beta 1      | 1.5021 |
| ENSG00000277791 | PSMB3       | proteasome subunit beta 3                                  | 1.0930 |
| ENSG00000092010 | PSME1       | proteasome activator subunit 1                             | 1.3391 |
| ENSG00000240065 | PSMB9       | proteasome subunit beta 9                                  | 1.2111 |

**COSTIMULATION BY THE CD28 FAMILY**

| Ensembl ID      | Gene Symbol | Annotation                                            | logFC  |
|-----------------|-------------|-------------------------------------------------------|--------|
| ENSG00000121594 | CD80        | CD80 molecule                                         | 2.1157 |
| ENSG00000142208 | AKT1        | AKT serine/threonine kinase 1                         | 1.3451 |
| ENSG00000163599 | CTLA4       | cytotoxic T-lymphocyte associated protein 4           | 2.2112 |
| ENSG00000198821 | CD247       | CD247 molecule                                        | 2.3690 |
| ENSG00000188389 | PDCD1       | programmed cell death 1                               | 1.6145 |
| ENSG00000179344 | HLA-DRB1    | major histocompatibility complex, class II, DR beta 1 | 2.0547 |
| ENSG00000196126 | HLA-DQB1    | major histocompatibility complex, class II, DQ beta 1 | 1.5021 |

**PD-1 SIGNALLING**

| Ensembl ID      | Gene Symbol | Annotation                                            | logFC  |
|-----------------|-------------|-------------------------------------------------------|--------|
| ENSG00000198821 | CD247       | CD247 molecule                                        | 2.3690 |
| ENSG00000188389 | PDCD1       | programmed cell death 1                               | 1.6145 |
| ENSG00000179344 | HLA-DRB1    | major histocompatibility complex, class II, DR beta 1 | 2.0547 |
| ENSG00000196126 | HLA-DQB1    | major histocompatibility complex, class II, DQ beta 1 | 1.5021 |

**MHC CLASS II ANTIGEN PRESENTATION**

| Ensembl ID      | Gene Symbol | Annotation                                            | logFC  |
|-----------------|-------------|-------------------------------------------------------|--------|
| ENSG00000019582 | CD74        | CD74 molecule                                         | 1.3253 |
| ENSG00000089692 | LAG3        | lymphocyte activating 3                               | 3.1539 |
| ENSG00000179344 | HLA-DRB1    | major histocompatibility complex, class II, DR beta 1 | 2.0547 |
| ENSG00000196126 | HLA-DQB1    | major histocompatibility complex, class II, DQ beta 1 | 1.5021 |



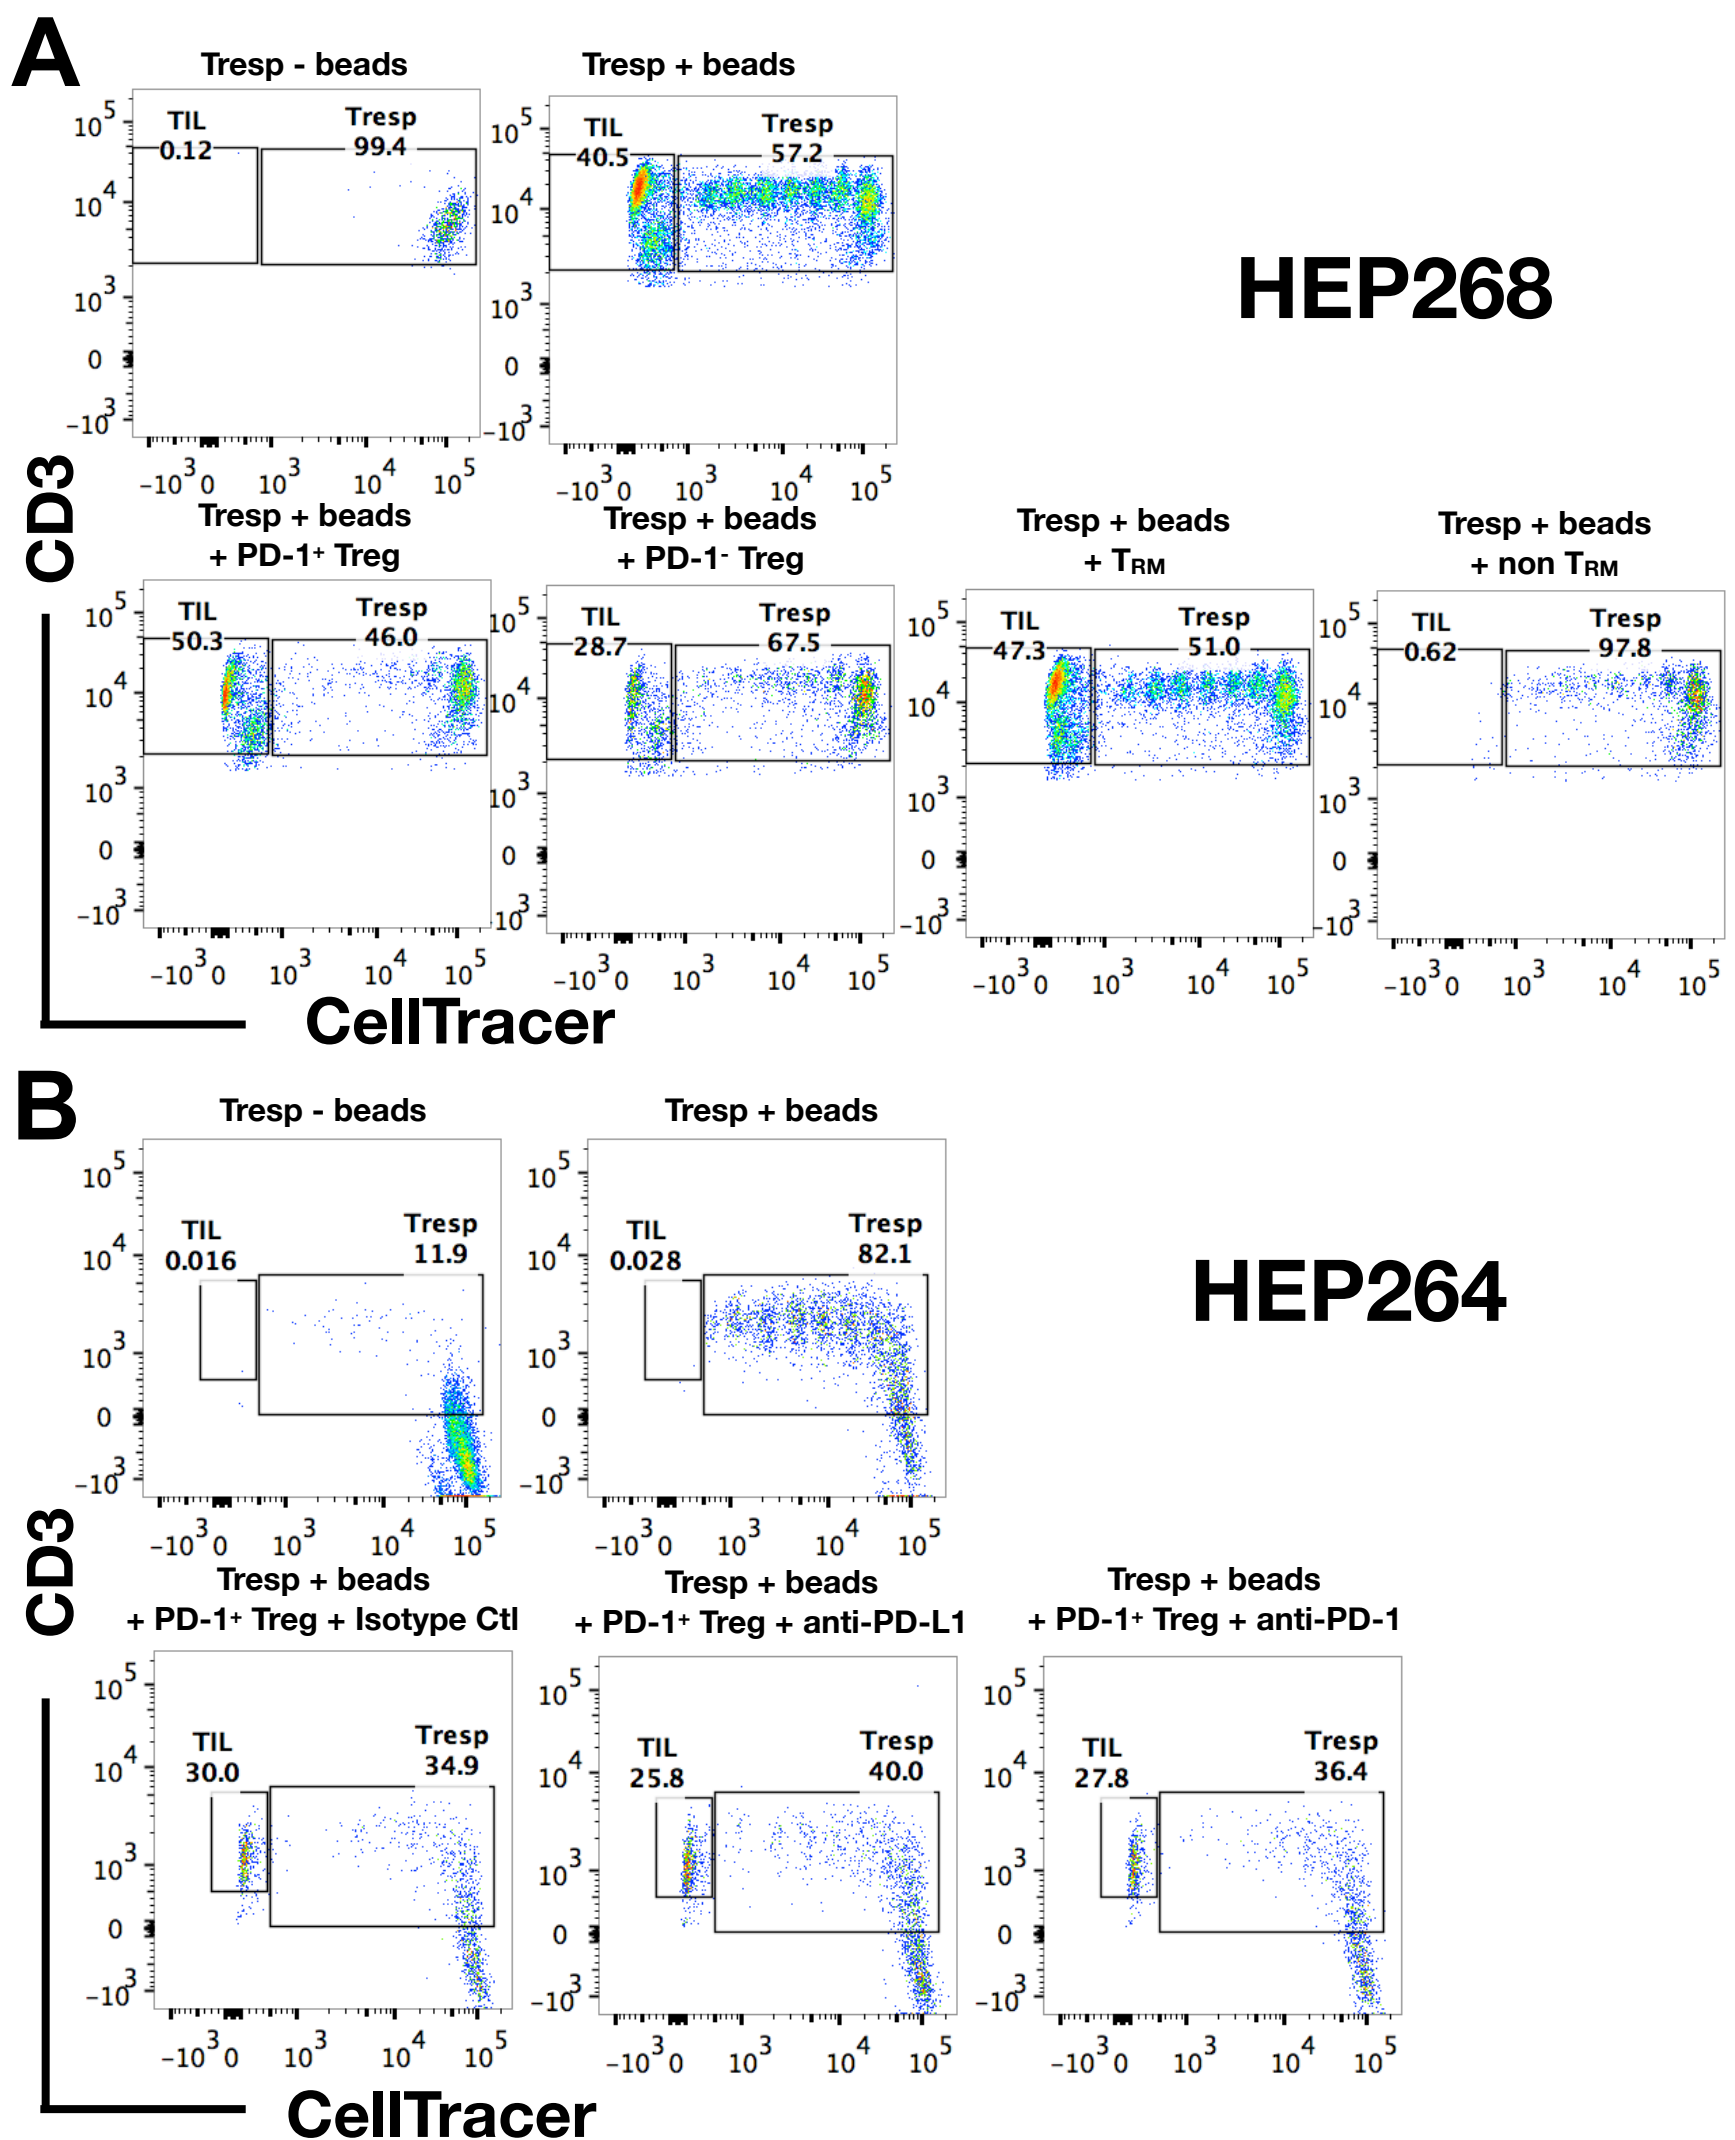

**Figure S6 : Tresp cell proliferation profiles incubated with various TILs and check-point inhibitors**

- A. Proliferation of Tresp cells determined according to dilution cycles of CellTracer signal when co-cultured without or with T<sub>REG</sub> proliferation beads (top panel) or with T<sub>REG</sub> proliferation beads and PD-1<sup>+</sup> T<sub>REG</sub>, PD-1<sup>-</sup> T<sub>REG</sub>, T<sub>RM</sub> or non T<sub>RM</sub> from TILs (lower panel). Representative plots from HBV-related HCC patient HEP268.
- B. Proliferation of Tresp cells when co-cultured without or with T<sub>REG</sub> proliferation beads (top panel) or with T<sub>REG</sub> proliferation beads, PD-1<sup>+</sup> T<sub>REG</sub> and with either isotype control, anti-PD-L1 or anti-PD-1 antibody (lower panel). Representative plots from HBV-related HCC patient HEP264.
- TILs: tumor-infiltrating lymphocytes; Tresp: T-responders cells
